# Supplementary material for: Proposal of the reverse flow model for the origin of the eukaryotic cell based on comparative analyses of Asgard archaeal metabolism
Source: Springer Nature journal article supplement (doi:10.1038/s41564-019-0406-9), 2019-04-01
Supplement: 41564_2019_406_MOESM2_ESM.pdf [file 41564_2019_406_MOESM2_ESM.pdf]

## Reporting Summary

Nature Research wishes to improve the reproducibility of the work that we publish. This form provides structure for consistency and transparency in reporting. For further information on Nature Research policies, see [Authors & Referees](#) and the [Editorial Policy Checklist](#).

### Statistical parameters

When statistical analyses are reported, confirm that the following items are present in the relevant location (e.g. figure legend, table legend, main text, or Methods section).

n/a Confirmed

- The exact sample size ( $n$ ) for each experimental group/condition, given as a discrete number and unit of measurement
- An indication of whether measurements were taken from distinct samples or whether the same sample was measured repeatedly
- The statistical test(s) used AND whether they are one- or two-sided  
*Only common tests should be described solely by name; describe more complex techniques in the Methods section.*
- A description of all covariates tested
- A description of any assumptions or corrections, such as tests of normality and adjustment for multiple comparisons
- A full description of the statistics including central tendency (e.g. means) or other basic estimates (e.g. regression coefficient) AND variation (e.g. standard deviation) or associated estimates of uncertainty (e.g. confidence intervals)
- For null hypothesis testing, the test statistic (e.g.  $F$ ,  $t$ ,  $r$ ) with confidence intervals, effect sizes, degrees of freedom and  $P$  value noted  
*Give  $P$  values as exact values whenever suitable.*
- For Bayesian analysis, information on the choice of priors and Markov chain Monte Carlo settings
- For hierarchical and complex designs, identification of the appropriate level for tests and full reporting of outcomes
- Estimates of effect sizes (e.g. Cohen's  $d$ , Pearson's  $r$ ), indicating how they were calculated
- Clearly defined error bars  
*State explicitly what error bars represent (e.g. SD, SE, CI)*

Our web collection on [statistics for biologists](#) may be useful.

### Software and code

Policy information about [availability of computer code](#)

Data collection

The genomes of the 10 Asgard representatives were downloaded from NCBI.

Data analysis

Databases used to analyze data and or against which data was compared:

- nr (<ftp://ftp.ncbi.nlm.nih.gov/>)
- UniProtKB (<https://www.uniprot.org/>)
- HydDB (<https://services.birc.au.dk/hyddb/>)
- Carbohydrate-Active enZymes (CAZymes) database (<http://www.cazy.org/>)
- MEROPS peptidase database (<https://www.ebi.ac.uk/merops/>)
- esterases were predicted using HMM-profiles from the ESTHER database (<https://www.re3data.org/repository/r3d100010542>)
- transporter database (<http://www.tcdb.org/>)
- Metacyc Metabolic Pathway Database (<https://metacyc.org/>)
- KEGG (<https://www.genome.jp/kegg/>)
- COGs and arCOGs (<ftp://ftp.ncbi.nlm.nih.gov/pub/wolf/COGs/arCOG>)

Data was analyzed using the following published softwares:

- dbCAN webtool75
- blastdbcmd version 2.6.0+
- Interproscan-5.22-61.0
- HMMer vs. 3.1b2

- PSORT v3.0
- Mafft-LINSi v7.305b
- BMGE-1.12
- IQ-TREE v. 1.5.5
- Phylobayes MPI 1.7
- Psort v3.0
- R v3.3.0 (including plyr v 1.8.4 and ggplot2 v3.0.0)
- DIAMOND v0.9.9.110
- CD-HIT version 4.6
- FastTree version 2.1.9
- TrimAL v1.4
- Jalview 2.10.2b2
- Seaview n.d.
- FigTree v1.4.2

Data Visualization:

- Adobe Illustrator CC 2015 (19.2.0)

For manuscripts utilizing custom algorithms or software that are central to the research but not yet described in published literature, software must be made available to editors/reviewers upon request. We strongly encourage code deposition in a community repository (e.g. GitHub). See the Nature Research [guidelines for submitting code & software](#) for further information.

## Data

Policy information about [availability of data](#)

All manuscripts must include a [data availability statement](#). This statement should provide the following information, where applicable:

- Accession codes, unique identifiers, or web links for publicly available datasets
- A list of figures that have associated raw data
- A description of any restrictions on data availability

### Data and code availability

The genomes of the herein analysed Asgard archaea have been made publicly available on NCBI previously. Detailed annotations of the metabolic repertoire are provided in Suppl. Tables 1-3 accompanying this manuscript. Raw data files and custom scripts are made available via figshare under the following link: <https://figshare.com/s/5f153d1dcacadd3b3ed6>.

## Field-specific reporting

Please select the best fit for your research. If you are not sure, read the appropriate sections before making your selection.

Life sciences       Behavioural & social sciences       Ecological, evolutionary & environmental sciences

For a reference copy of the document with all sections, see [nature.com/authors/policies/ReportingSummary-flat.pdf](https://nature.com/authors/policies/ReportingSummary-flat.pdf)

## Ecological, evolutionary & environmental sciences study design

All studies must disclose on these points even when the disclosure is negative.

|                          |                                                                                                                                                                                                                                                                                                                                                                                                                                                                                                                                                                                                                                                                                                                                           |
|--------------------------|-------------------------------------------------------------------------------------------------------------------------------------------------------------------------------------------------------------------------------------------------------------------------------------------------------------------------------------------------------------------------------------------------------------------------------------------------------------------------------------------------------------------------------------------------------------------------------------------------------------------------------------------------------------------------------------------------------------------------------------------|
| Study description        | We performed comparative genomics and phylogenomic analyses of published (publicly available) genomes of the Asgard archaea to infer their metabolic potential. Based on this analysis we update hypotheses on the origin of the eukaryotic cell.                                                                                                                                                                                                                                                                                                                                                                                                                                                                                         |
| Research sample          | We analysed the genomes of Asgard archaea available at NCBI in January 2017, i.e. 2 published Lokiarchaeota (strains GC14_75 and CR4), 4 published Thorarchaeota (strains SMTZ-45, SMTZ1-83, SMTZ1-45 and AB25), 3 published Heimdallarchaeota (strains LC3, AB125 and LC2) and one published Odinararchaeote (strain LCB_4). Files of the metagenome assembled genomes of these Asgard archaea were retrieved from the ftp server of NCBI ( <a href="ftp://ftp.ncbi.nih.gov/genomes/genbank/archaea/">ftp://ftp.ncbi.nih.gov/genomes/genbank/archaea/</a> ).                                                                                                                                                                             |
| Sampling strategy        | We did not obtain any new samples, as these genomes have already been reconstructed in previous and published work.                                                                                                                                                                                                                                                                                                                                                                                                                                                                                                                                                                                                                       |
| Data collection          | The genome data described in the present manuscript was downloaded from the ftp server of NCBI and originally deposited along with following references:<br>Spang, A. et al. Complex archaea that bridge the gap between prokaryotes and eukaryotes. Nature 521, 173-+, doi:10.1038/nature14447 (2015).<br>Seitz, K. W., Lazar, C. S., Hinrichs, K. U., Teske, A. P. & Baker, B. J. Genomic reconstruction of a novel, deeply branched sediment archaeal phylum with pathways for acetogenesis and sulfur reduction. The ISME Journal, doi:10.1038/ismej.2015.233 (2016).<br>Zaremba-Niedzwiedzka, K. et al. Asgard archaea illuminate the origin of eukaryotic cellular complexity. Nature 541, 353-358, doi:10.1038/nature21031 (2017). |
| Timing and spatial scale | We herein analyzed genomes of Asgard archaea deposited at NCBI in January 2017. Timing and spacial scale were not studied.                                                                                                                                                                                                                                                                                                                                                                                                                                                                                                                                                                                                                |

Data exclusions

Reproducibility

Randomization

Blinding

Did the study involve field work?  Yes  No

## Reporting for specific materials, systems and methods

### Materials & experimental systems

- | n/a                                 | Included in the study                                |
|-------------------------------------|------------------------------------------------------|
| <input checked="" type="checkbox"/> | <input type="checkbox"/> Unique biological materials |
| <input checked="" type="checkbox"/> | <input type="checkbox"/> Antibodies                  |
| <input checked="" type="checkbox"/> | <input type="checkbox"/> Eukaryotic cell lines       |
| <input checked="" type="checkbox"/> | <input type="checkbox"/> Palaeontology               |
| <input checked="" type="checkbox"/> | <input type="checkbox"/> Animals and other organisms |
| <input checked="" type="checkbox"/> | <input type="checkbox"/> Human research participants |

### Methods

- | n/a                                 | Included in the study                           |
|-------------------------------------|-------------------------------------------------|
| <input checked="" type="checkbox"/> | <input type="checkbox"/> ChIP-seq               |
| <input checked="" type="checkbox"/> | <input type="checkbox"/> Flow cytometry         |
| <input checked="" type="checkbox"/> | <input type="checkbox"/> MRI-based neuroimaging |
